# Supplementary material for: Evaluation of Tegaran Formula ZhenHua cytotoxicity against human cancer cell lines
Source: PLOS journal article supplement (doi:10.1371/journal.pone.0240969), 2020-10-21
Supplement: S11 (10.1371/journal.pone.0240969.s011) [file journal.pone.0240969.s011]

**S1 Table.** Absorbance Measurement and statistical analysis (MCF7, MTT, 72h).

| **Tegaran mg/ml** | **Absorbance** | | | **Mean** | **Standard Deviation** |
| --- | --- | --- | --- | --- | --- |
| **Untreated** | 0,95 | 1,027 | 1,128 | 1,035 | 0,072888 |
| **0.075** | 1,095 | 1,06 | 1,076 | 1,077 | 0,014306 |
| **0.15** | 1,005 | 1,007 | 1,097 | 1,036333 | 0,042906 |
| **0.3** | 0,025 | 0,013 | 0,063 | 0,033667 | 0,021312 |
| **0.75** | 0,008 | 0,004 | 0,006 | 0,006 | 0,001633 |
| **1.5** | 0,004 | 0,004 | 0,004 | 0,004 | 0 |
| **3** | 0,019 | 0,018 | 0,038 | 0,025 | 0,009201 |
