# Supplementary material for: Evaluation of Tegaran Formula ZhenHua cytotoxicity against human cancer cell lines
Source: PLOS journal article supplement (doi:10.1371/journal.pone.0240969), 2020-10-21
Supplement: S13 (10.1371/journal.pone.0240969.s013) [file journal.pone.0240969.s013]

**S3 Table.** Calculation of the cytotoxicity percentage of Tegaran against MCF7 cell line (MTT, 72h).

| **Tegaran mg/ml** | **Viability Mean** | **Cytotoxicity (100- Viability Mean)** |
| --- | --- | --- |
| **0.075** | 104,058 | -4,05797 |
| **0.15** | 100,1288 | -0,12882 |
| **0.3** | 3,252818 | 96,74718 |
| **0.75** | 0,57971` | 99,42029 |
| **1.5** | 0,386473 | 99,61353 |
| **3** | 2,415459 | 97,58454 |
